# Supplementary material for: A simple strategy for improving the energy conversion of multilayered CdTe quantum dot-sensitized solar cells
Source: Royal Society of Chemistry journal article supplement (doi:10.1039/b817000b), 2009-01-01
Supplement: b817000b.pdf [file b817000b.pdf]

# A Simple Strategy for Improving the Energy Conversion of Multilayered CdTe Quantum Dot-Sensitized Solar Cells

*Guo-Yu Lan, Zusing Yang, Yang-Wei Lin, Zong-Hong Lin, Hao-Ying Liao, and Huan-Tsung Chang\**

Department of Chemistry, National Taiwan University, 1, Section 4, Roosevelt Road, Taipei 106,  
Taiwan

**Correspondence:** Professor Huan-Tsung Chang, Department of Chemistry, National Taiwan University, 1, Section 4, Roosevelt Road, Taipei 106, Taiwan

Tel and fax: 011-886-2-33661171

E-mail: [changht@ntu.edu.tw](mailto:changht@ntu.edu.tw)

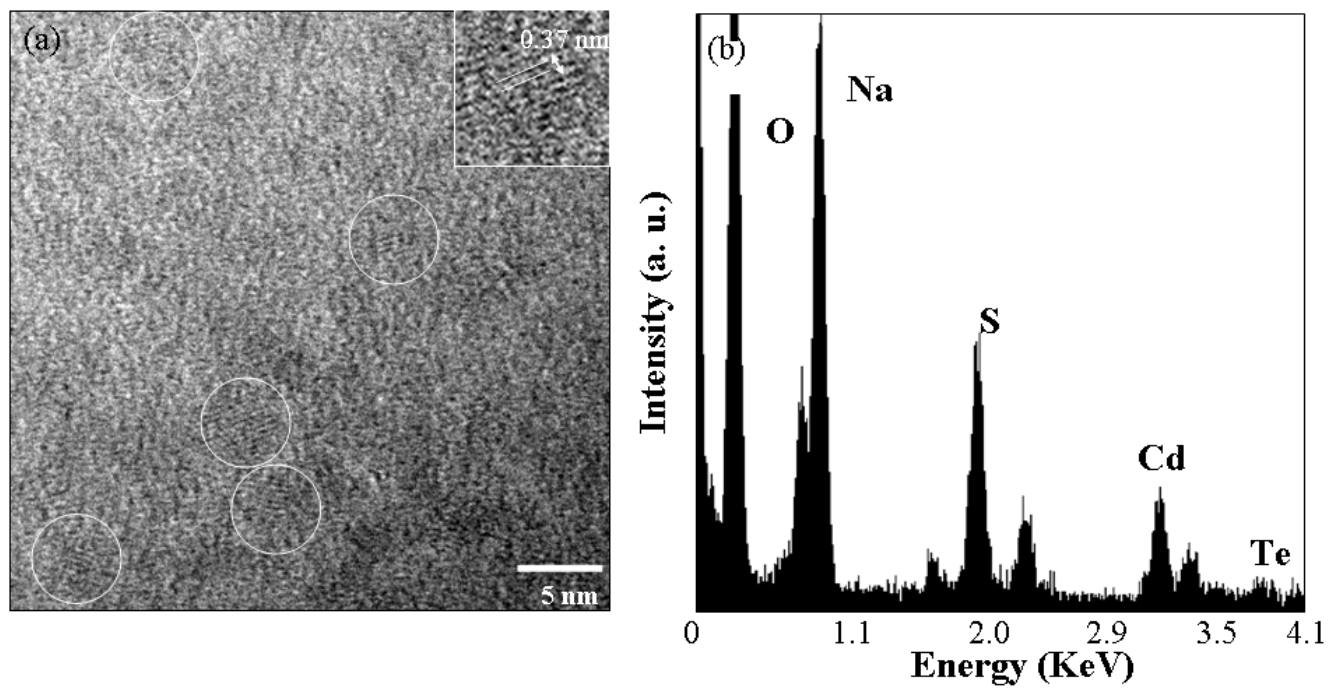

**Figure S1.** (a) HR-TEM image of the CdTe QDs and (inset) their  $d$  spacing. (b) Corresponding EDX spectrum of CdTe QDs.

(a)

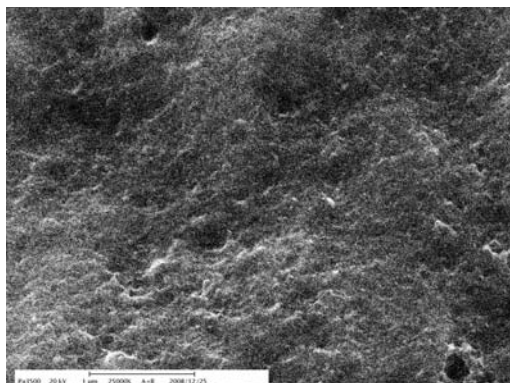

(b)

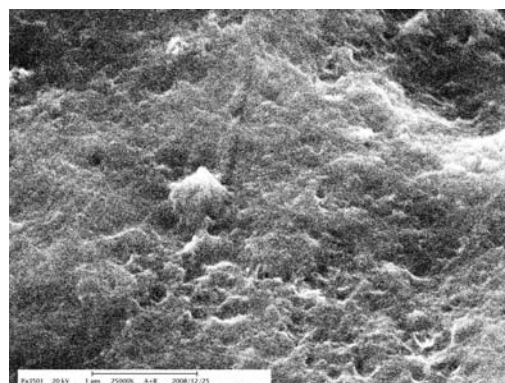

(c)

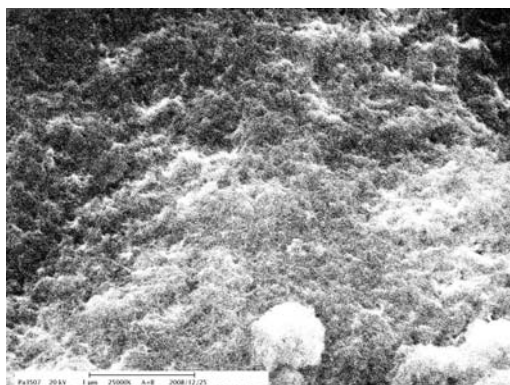

(d)

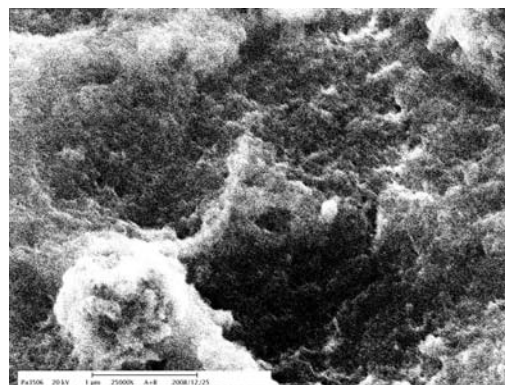

**Figure S2.** SEM images of the  $(\text{TiO}_2)_3\text{-PDDA-(QD}_{\text{CdTe}})_n\text{-FTO}$  electrodes. (a)  $n = 1$ , (b)  $n = 2$ , (c)  $n = 3$  and (d)  $n = 4$ .

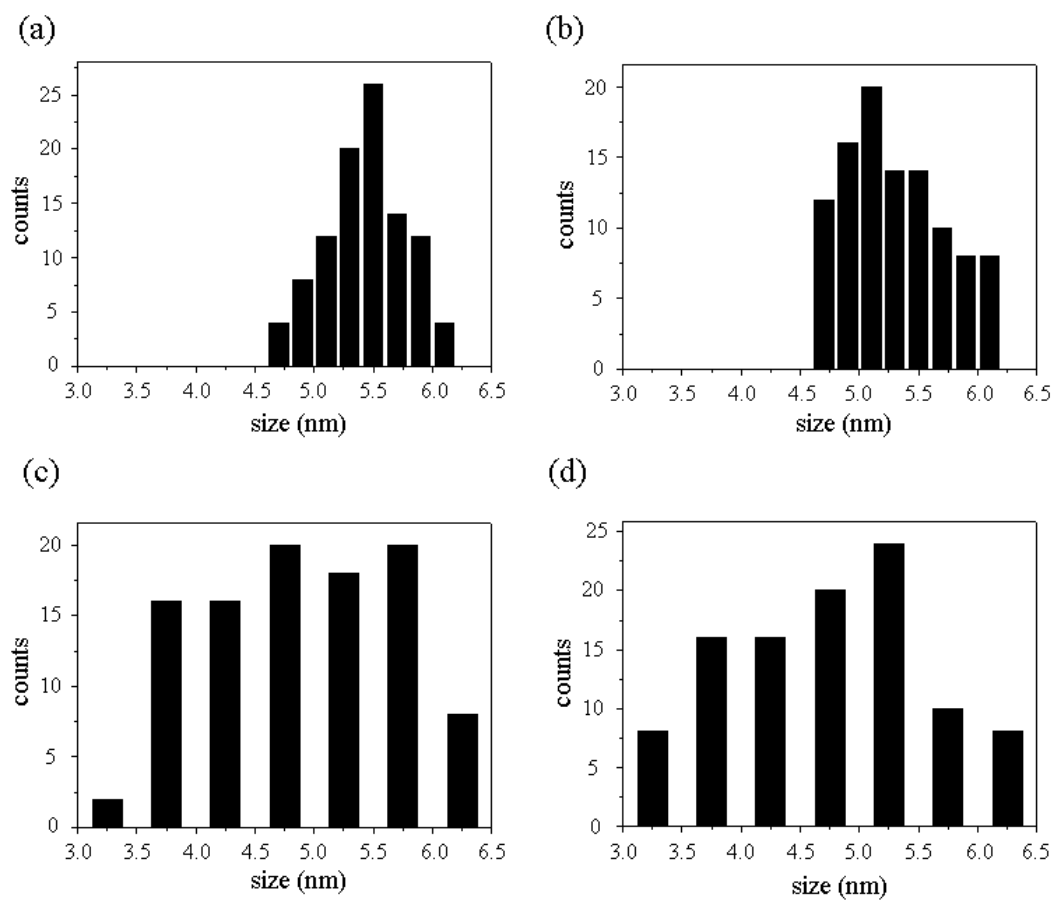

**Figure S3.** Histograms show the size distribution of CdTe QDs in the  $(\text{TiO}_2)_3\text{-PDDA}-(\text{QD}_{\text{CdTe}})_n$ -FTO electrodes. (a)  $n = 1$ , (b)  $n = 2$ , (c)  $n = 3$  and (d)  $n = 4$ .
